# Supplementary material for: Calreticulin-mutant proteins induce megakaryocytic signaling to transform hematopoietic cells and undergo accelerated degradation and Golgi-mediated secretion
Source: PubMed Central journal article supplement (PMC4894373; doi:10.1186/s13045-016-0275-0), 2016-05-13

Additional file 2: Figure S2

**a**

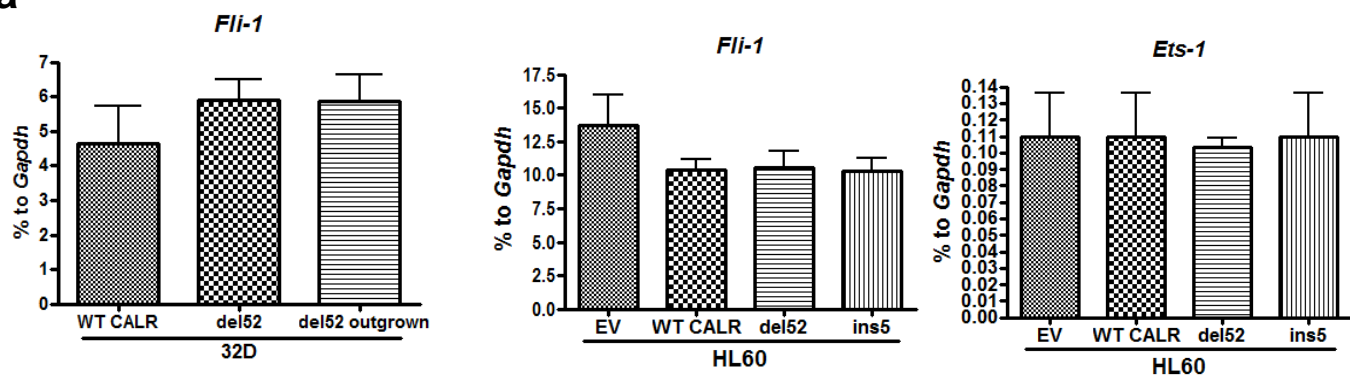

**b**

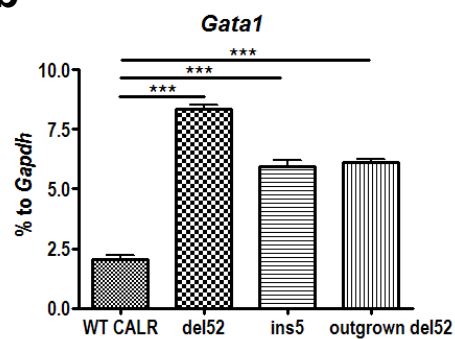

**c**

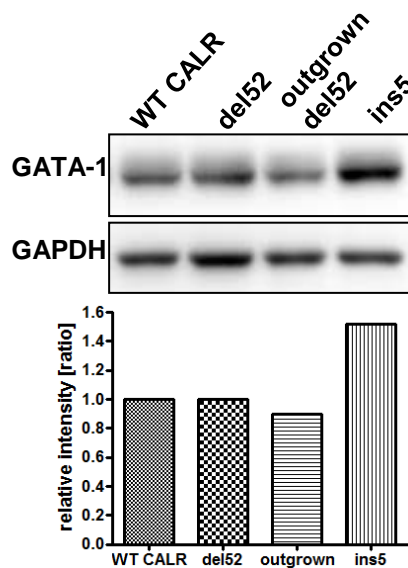

**d**

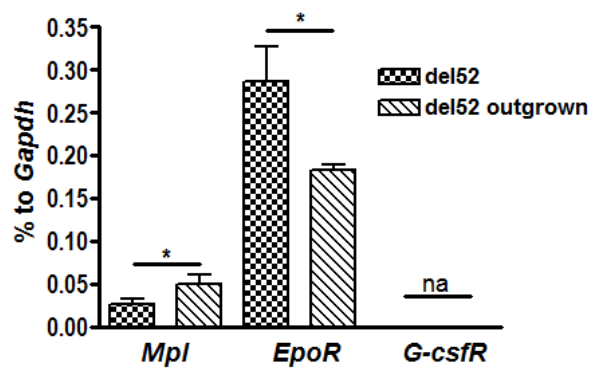

**e**

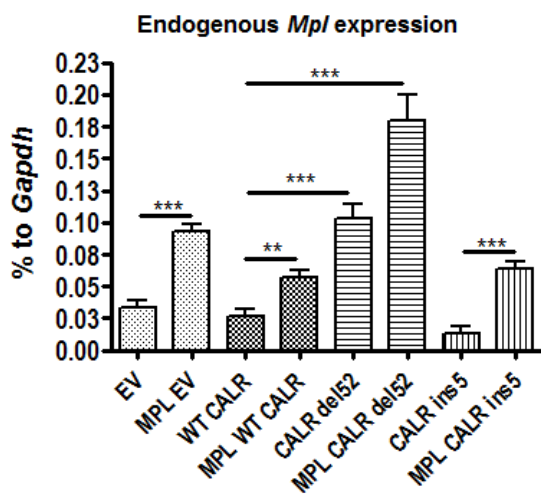

Supplement: 13045_2016_275_MOESM2_ESM.pdf [file 13045_2016_275_MOESM2_ESM.pdf]
