# Supplementary material for: Calreticulin-mutant proteins induce megakaryocytic signaling to transform hematopoietic cells and undergo accelerated degradation and Golgi-mediated secretion
Source: Springer Nature journal article supplement (doi:10.1186/s13045-016-0275-0), 2016-05-13

Additional file 5: Figure S5

**a**

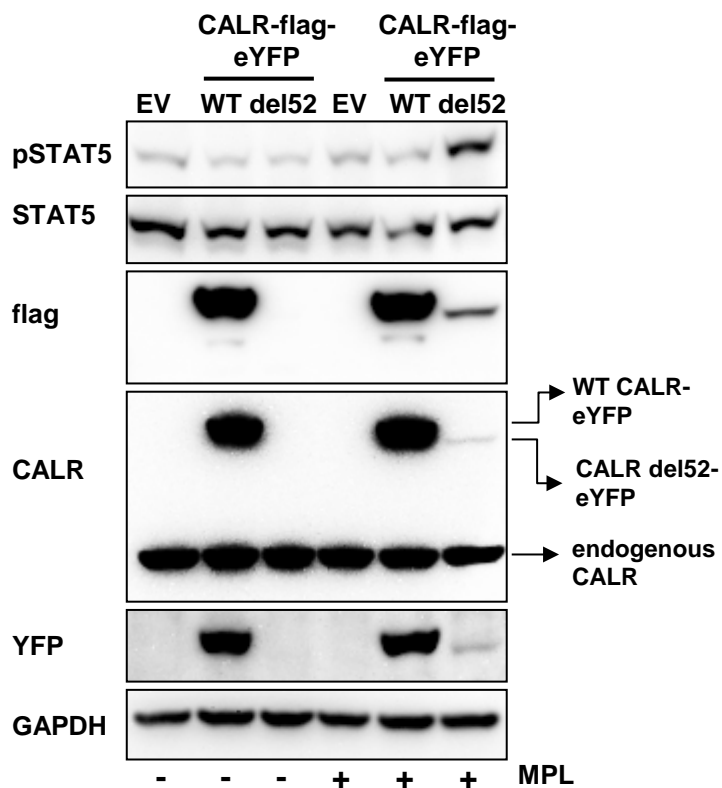

**b**

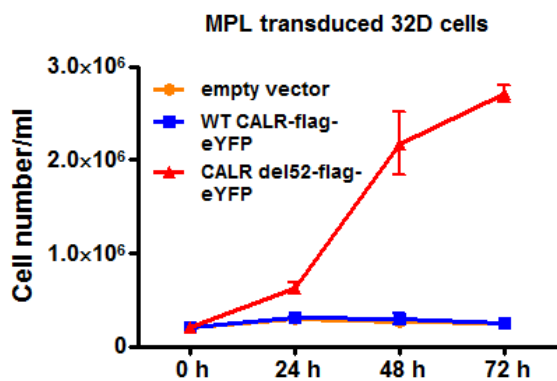

Supplement: MOESM5 [file 10122790]
