# Supplementary material for: Calreticulin-mutant proteins induce megakaryocytic signaling to transform hematopoietic cells and undergo accelerated degradation and Golgi-mediated secretion
Source: J Hematol Oncol. 2016 May 13;9:45. doi: 10.1186/s13045-016-0275-0 (PMC4894373; doi:10.1186/s13045-016-0275-0)
Supplement: Supplementary file 1 — Supplementary material & methods. [file 13045_2016_275_MOESM1_ESM.pdf]

## 1 **Additional File 1: Supplementary material and methods (.pdf)**

### 2 DNA constructs and vectors

3 The cDNA of human EPOR was PCR amplified using primers flanking the cDNA and  
4 generating NotI and BamHI restriction sites. Following, the EPOR cDNA was cloned  
5 into the pMSCV-IRES-puromycin vector. The  $\Delta$ C-mutant of CALR was generated by  
6 PCR using the primers CGGCAGGAATTCATGCTGCTATCCGTGCCGCTGCTG  
7 (EcoRI-CALR for) and CAGGACGAGGAGCAGAGGGACTACAAGGACGACG  
8 ACGATAAGTAAGCGGCCGCCATC (CALR-flag-stop NotI rev) and cloned the  
9 fragment into the pcDNA5/FRT/TO vector. The stop-codon was inserted after  
10 arginine (R) 366.

### 11 Reagents and Antibodies

12 The monoclonal rabbit anti-mouse/human GATA-1 (D52H6) antibody was ordered  
13 from Cell Signaling/New England Biolabs (NEB, Frankfurt, Germany). For the  
14 detection of YFP anti-GFP (600-103-215, Rockland, Gilbertsville, USA) was used for  
15 immunoblotting. Human TPO and EPO were purchased from ImmunoTools  
16 (Friesoythe, Germany).

### 17 RT-qPCR

18 The sequences of primers used for RT-qPCR were as follows:  
19 TTGTCGCACCTCAGTTACCT (mu Fli-1 for), TCTTGCCCATGGTCTGTGAT (mu Fli-  
20 1 rev), GAAGGTGAAGGTCGGAGT (hu Gapdh for), GAAGATGGTGATGGGATTTC  
21 (hu Gapdh rev), GTGCTGTTGTCACACCTCAG (hu Fli-1 for),  
22 TACTGATCGTTTGTGCCCT (hu Fli-1 rev), TCGATCTCAAGCCGACTCTC (hu Ets-  
23 1 for), CATTACAGCCCACATCACC (hu Ets-1 rev), GAAACTCTTCCTGCCCGTC  
24 (mu *EpoR* for), TGAGATGCCAGAATCGGACA (mu *EpoR* rev),

25 GATTGTCAGCAAACGGGCAG (mu *Gata-1* for), CGGTTACCTGATGGAGCTT  
26 (mu *Gata-1* rev), TGCAGGAAGACAGTGGACAG (mu G-csfR for),  
27 GTGAAGAGGTCCCTGCTTTG (mu G-csfR rev). The mRNA expression level of the  
28 target gene is determined in % of *Gapdh* using  $2^{-\Delta CT}$ .

## 29 Native–PAGE

30 Cell lysates were prepared with RIPA buffer (see above) without sodium  
31 deoxycholate. Without prior boiling, lysates were electrophoresed on a non-  
32 denaturing (native) 8% polyacrylamide gel with cooling system. Western blotting was  
33 performed as described above.

## 34 Apoptosis assay

35 32D cells were seeded at a density of  $5 \times 10^5$  cells/ml and were cultured in WEHI-  
36 free RPMI medium. Apoptotic cells were measured 48 h later by Annexin V-APC/7-  
37 aminoactinomycin D (7-AAD) (APC Annexin V Apoptosis Detection Kit, Biolegend,  
38 San Diego, CA, USA), using a Gallios flow cytometer (Beckman Coulter, Krefeld,  
39 Germany).

## 40 Transient transfection

41 HEK293T cells ( $4 \times 10^6$ ) were subcultured on a 10 cm dish and the day after  
42 transiently transfected with the vector pcDNA5/FRT/TO (2 µg) including the cDNA of  
43 WT CALR-flag, CALR del52-flag and CALR-ΔC-flag or empty vector (EV),  
44 respectively. The transfection reagent TranIT-LT1 (Mirus Bio LCC) was used as  
45 recommended by the instruction. After incubation of 24 h cellular lysates were  
46 prepared.

47
